# Supplementary material for: PD-1- CD45RA+ effector-memory CD8 T cells and CXCL10+ macrophages are associated with response to atezolizumab plus bevacizumab in advanced hepatocellular carcinoma
Source: PubMed Central journal article supplement (PMC10687033; doi:10.1038/s41467-023-43381-1), 2023-11-29
Supplement: 41467_2023_43381_MOESM1_ESM.pdf [file 41467_2023_43381_MOESM1_ESM.pdf]

**PD-1<sup>+</sup> CD45RA<sup>+</sup> effector-memory CD8 T-cells and CXCL10 macrophages are associated with response to atezolizumab plus bevacizumab in advanced hepatocellular carcinoma**

Sarah Cappuyns<sup>1,2,3,4</sup>, Gino Philips<sup>3,4</sup>, Vincent Vandecaveye<sup>5,6</sup>, Bram Boeckx<sup>3,4</sup>, Rogier Schepers<sup>3,4</sup>, Thomas van Brussel<sup>3,4</sup>, Ingrid Arijs<sup>3,4</sup>, Aurelie Mechels<sup>3,4</sup>, Ayse Bassez<sup>3,4</sup>, Francesca Lodi<sup>3,4</sup>, Joris Jaekers<sup>7</sup>, Halit Topal<sup>7</sup>, Baki Topal<sup>7</sup>, Orian Bricard<sup>3,4</sup>, Junbin Qian<sup>3,4,8,9</sup>, Eric Van Cutsem<sup>1,2</sup>, Chris Verslype<sup>1,2</sup>, Diether Lambrechts<sup>3,4,\*</sup>, Jeroen Dekervel<sup>1,2,\*</sup>

<sup>1</sup>Digestive Oncology, Department of Gastroenterology, University Hospitals Leuven, Leuven, Belgium

<sup>2</sup>Laboratory of Clinical Digestive Oncology, Department of Oncology, KU Leuven, Leuven, Belgium

<sup>3</sup>Laboratory for Translational Genetics, Department of Human Genetics, KU Leuven, Leuven, Belgium

<sup>4</sup>VIB Centre for Cancer Biology, Leuven, Belgium

<sup>5</sup>Radiology Department, University Hospitals Leuven, Leuven, Belgium

<sup>6</sup>Laboratory of Translational MRI, Department of Imaging and Pathology, KU Leuven, Leuven, Belgium

<sup>7</sup>Hepatobiliary- and pancreas Surgery, Department of Abdominal Surgery, University Hospitals Leuven, Leuven, Belgium

<sup>8</sup>Zhejiang Provincial Key Laboratory of Precision Diagnosis and Therapy for Major Gynaecological Diseases, Women's Hospital, Zhejiang University School of Medicine, Hangzhou, China

<sup>9</sup>Institute of Genetics, Zhejiang University School of Medicine, Hangzhou, China

## Supplementary Data

1. [Supplementary Figures S1-S7](#)
2. [Supplementary Tables S1-S3](#)

# 1. Supplementary Figures

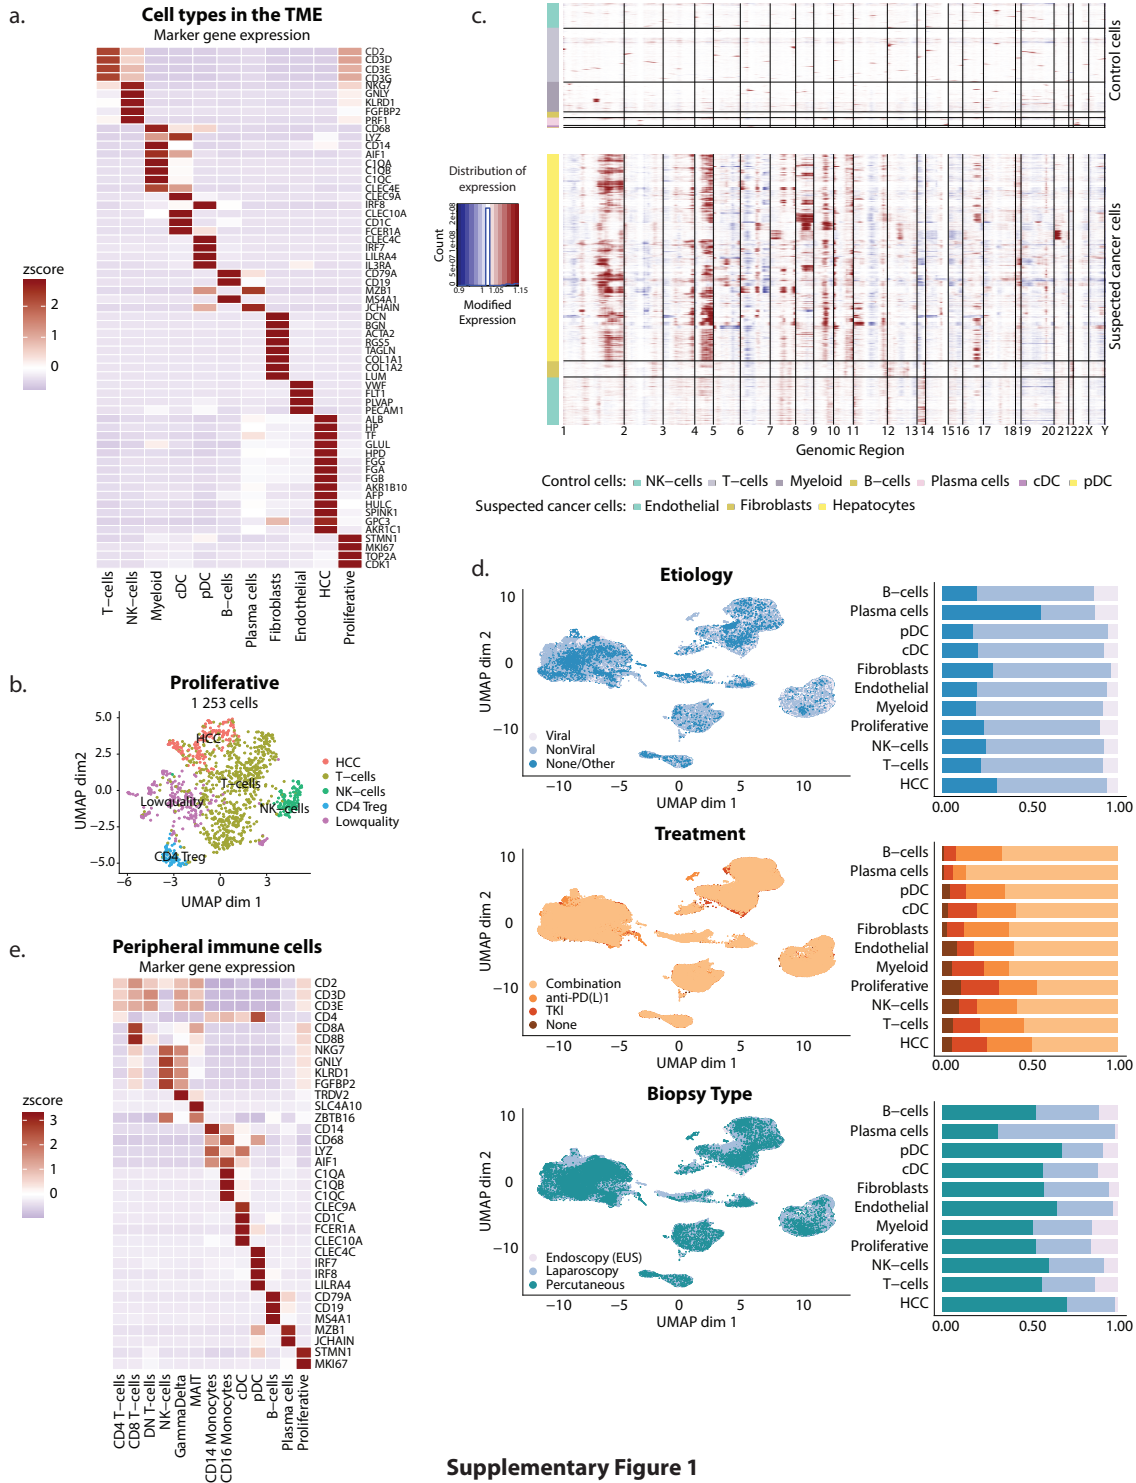

Supplementary Figure 1

Supplementary Figure 1. **The TME and peripheral immune system of aHCC**

**a.** Heatmap depicting the expression of marker genes in each cell type identified in the TME of aHCC. **b.** UMAP representation of the 'Proliferative' cluster, consisting of mostly proliferating T-cells. **c.** Inferring CNV from scRNAseq data. Top: CNV profiles of non-malignant controls: NK-cells, T-cells, Myeloid, B-cells, Plasma cells, cDC and pDC. Bottom: CNV profiles of suspected cancer cells. **d.** UMAP and bar plots colour-coded for underlying liver disease (*top*), treatment (*middle*) and biopsy type (*bottom*), showing their distribution across cell types. **e.** Heatmap depicting the expression of marker genes in each cell type identified in peripheral blood.

(CNV, Copy number variations; cDC, Conventional dendritic cells; pDC, Plasmacytoid dendritic cells; DN T-cells; Double Negative T-cells; EUS, Endoscopic ultra-sound; MAIT, Mucosal-associated invariant T-cells; TKI, tyrosine kinase inhibitor; TME, Tumour-microenvironment; UMAP, Uniform Manifold Approximation and Projection).

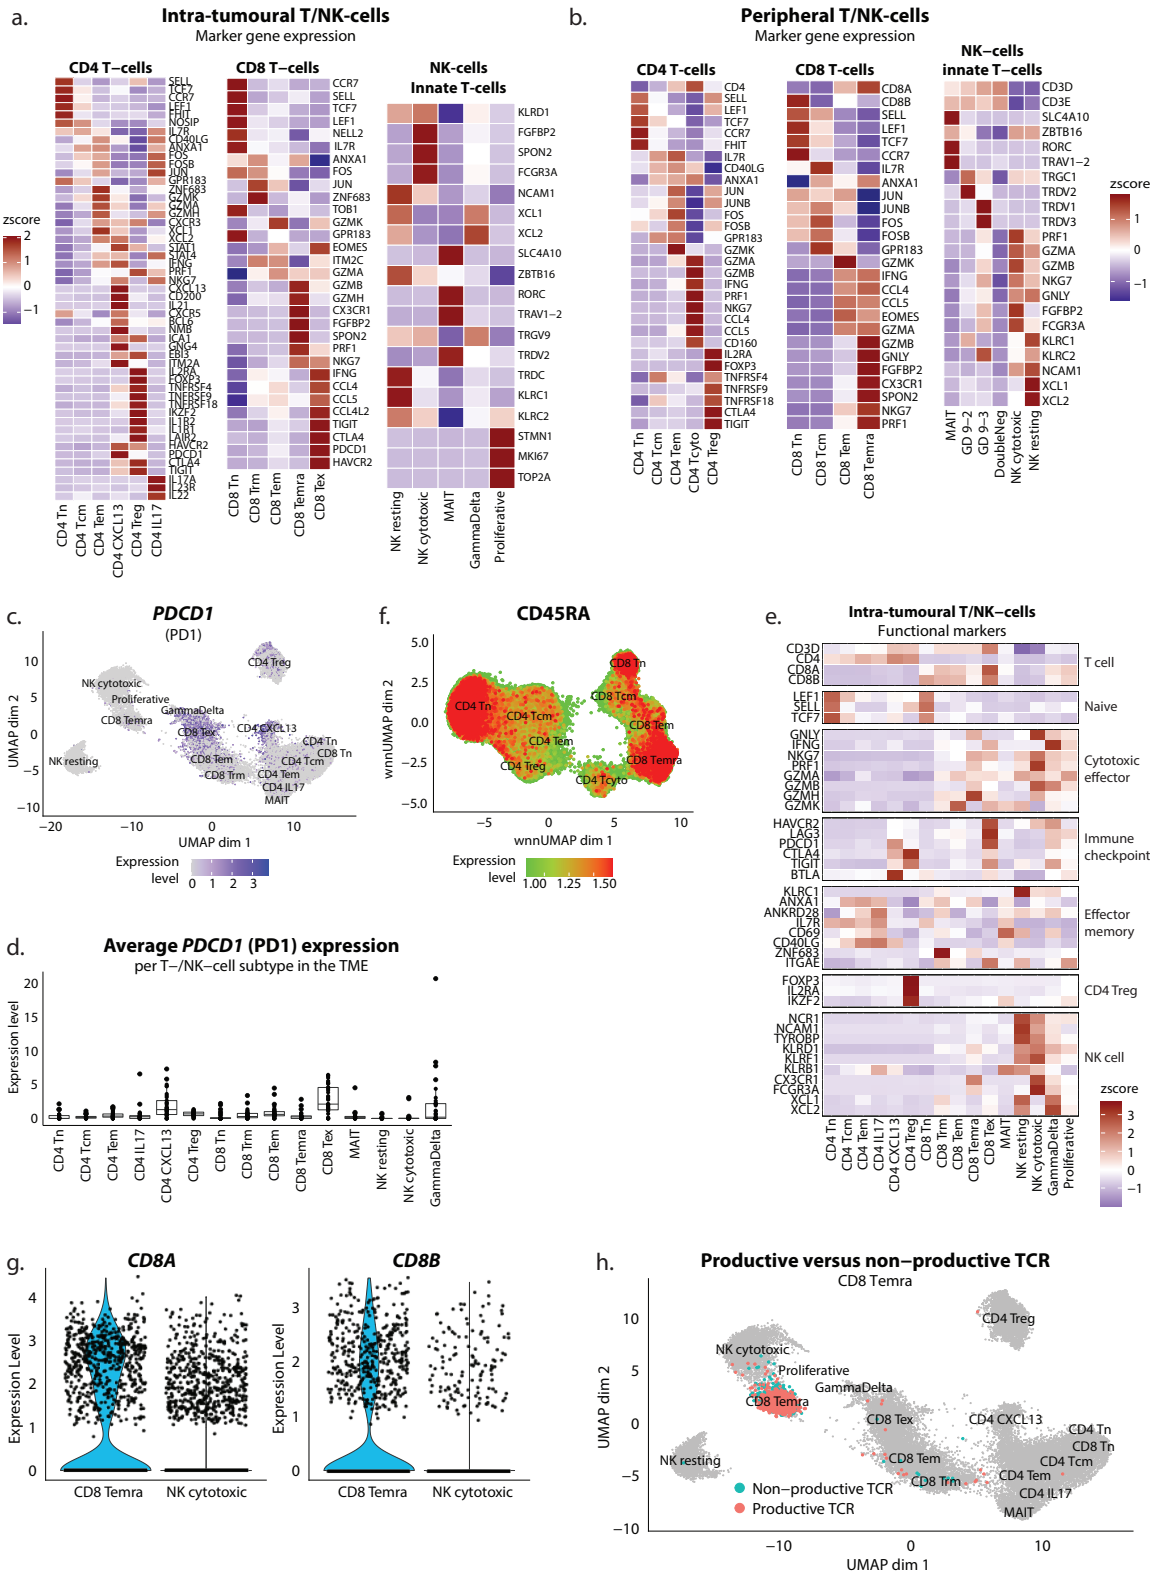

Supplementary Figure 2

Supplementary Figure 2. **Subclustering and annotation of intra-tumoural and peripheral T/NK-cell phenotypes**

**a.** Heatmaps showing expression of marker genes used for annotation of intra-tumoural T/NK-cell phenotypes. **b.** Heatmaps of showing the expression of marker genes used for annotation of peripheral T/NK-cell phenotypes. **c.** Feature plot of *PDCD1* (PD1) expression in intra-tumoural T/NK-cells. **d.** Boxplots depicting average *PDCD1* (PD1) expression level, calculated per patient (n=38) in each intra-tumoural T/NK-cell phenotype. Boxes indicate median +/- interquartile range; whiskers show minima and maxima. **e.** Heatmap displaying expression of functional genes in intra-tumoural T/NK-cell phenotypes. **f.** Feature plot of CD45RA using TotalSeq-C data in peripheral T-cells. **g.** Violin plot of *CD8A* (left) and *CD8B* (right) expression in intra-tumoural CD8 T<sub>EMRA</sub> and NK<sub>cytotoxic</sub>. **h.** UMAP representation of intra-tumoural T/NK-cells, coloured for productive versus non-productive TCR sequences in CD8 T<sub>EMRA</sub> cells.

(GD, Gamma-delta T-cells; PD1, Programmed cell death protein 1; UMAP, Uniform Manifold Approximation and Projection).

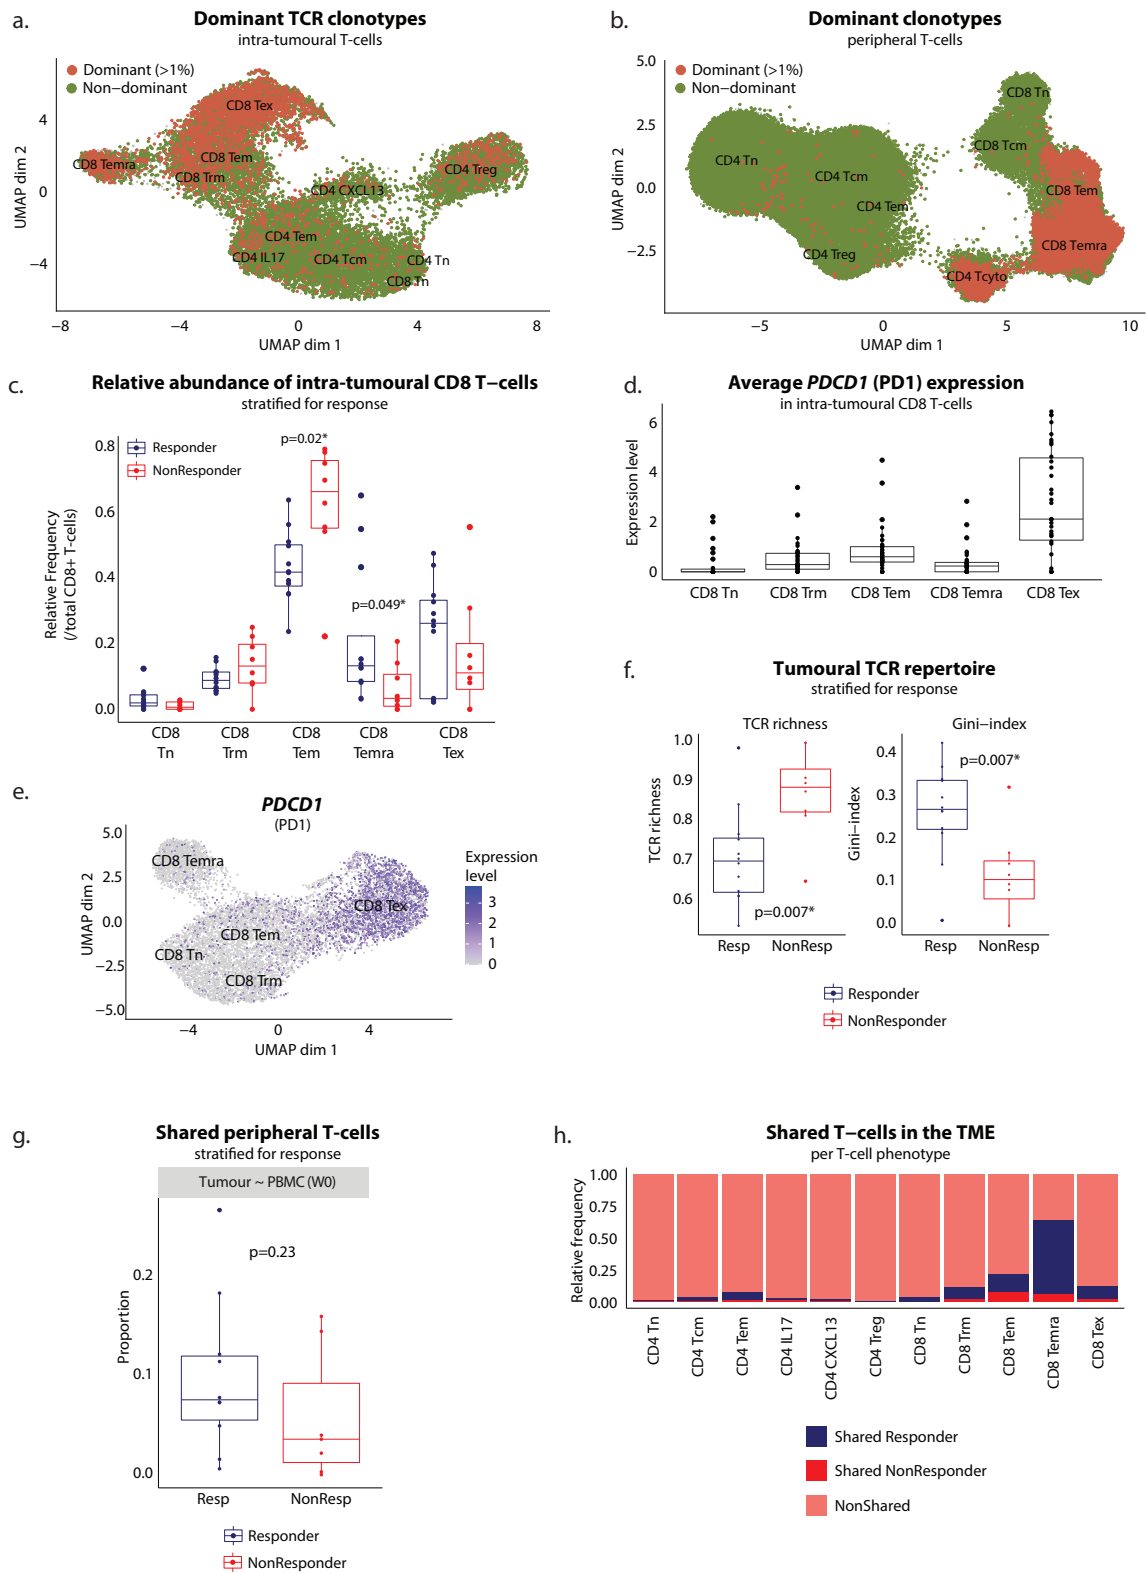

Supplementary Figure 3

### Supplementary Figure 3. Intra-tumoural T/NK-cells: comparative analyses

**a.** UMAP representation of dominant versus non-dominant clonotypes in intra-tumoural T-cells. Dominant clonotypes were defined as clonotypes representing 1% or more of the TCR repertoire per sample. **b.** UMAP representation of dominant versus non-dominant clonotypes in peripheral T-cells. Dominant clonotypes were defined as clonotypes representing 1% or more of the TCR repertoire per sample. **c.** Boxplots depicting relative abundance of intra-tumoural CD8 T-cell phenotypes in atezo/bev-treated patients (n=20), calculated per patient and stratified for response. P-values calculated using two-sided Mann-Whitney U-test, only p-values <0.05 are shown. Boxes indicate median +/- interquartile range; whiskers show minima and maxima. **d.** Boxplots depicting average *PDCD1* (PD1) expression level, calculated per patient (n=38) in each intra-tumoural CD8 T-cell phenotype. **e.** Feature plot of *PDCD1* (PD1) expression in intra-tumoural CD8 T-cells. Boxes indicate median +/- interquartile range; whiskers show minima and maxima. **f.** TCR richness (*left*) and Gini-index (*right*) in intra-tumoural T-cells in atezo/bev-treated patients (n=20), calculated per patient and stratified for response. P-values calculated using two sample T-test. Boxes indicate median +/- interquartile range; whiskers show minima and maxima. **g.** Boxplot depicting the proportion of peripheral T-cells carrying TCRs shared between tumour and PBMCs at week 0, relative to the total number of T-cells detected in peripheral blood, calculated per sample (n=17) and stratified for response to atezo/bev. P-values calculated using two-sample T-test. Boxes indicate median +/- interquartile range; whiskers show minima and maxima. **h.** Stacked bar graph displaying the proportion of shared T-cells in responders and non-responders versus non-shared T-cells in the TME. Shared T-cells are characterized by a TCR found in peripheral blood prior to treatment (week 0). (GD, Gamma-delta T-cells; PBMC, Peripheral blood mononuclear cells; PD1, Programmed cell death protein 1; TCR, T-cell receptor; TME, Tumour-microenvironment; UMAP, Uniform Manifold Approximation and Projection).



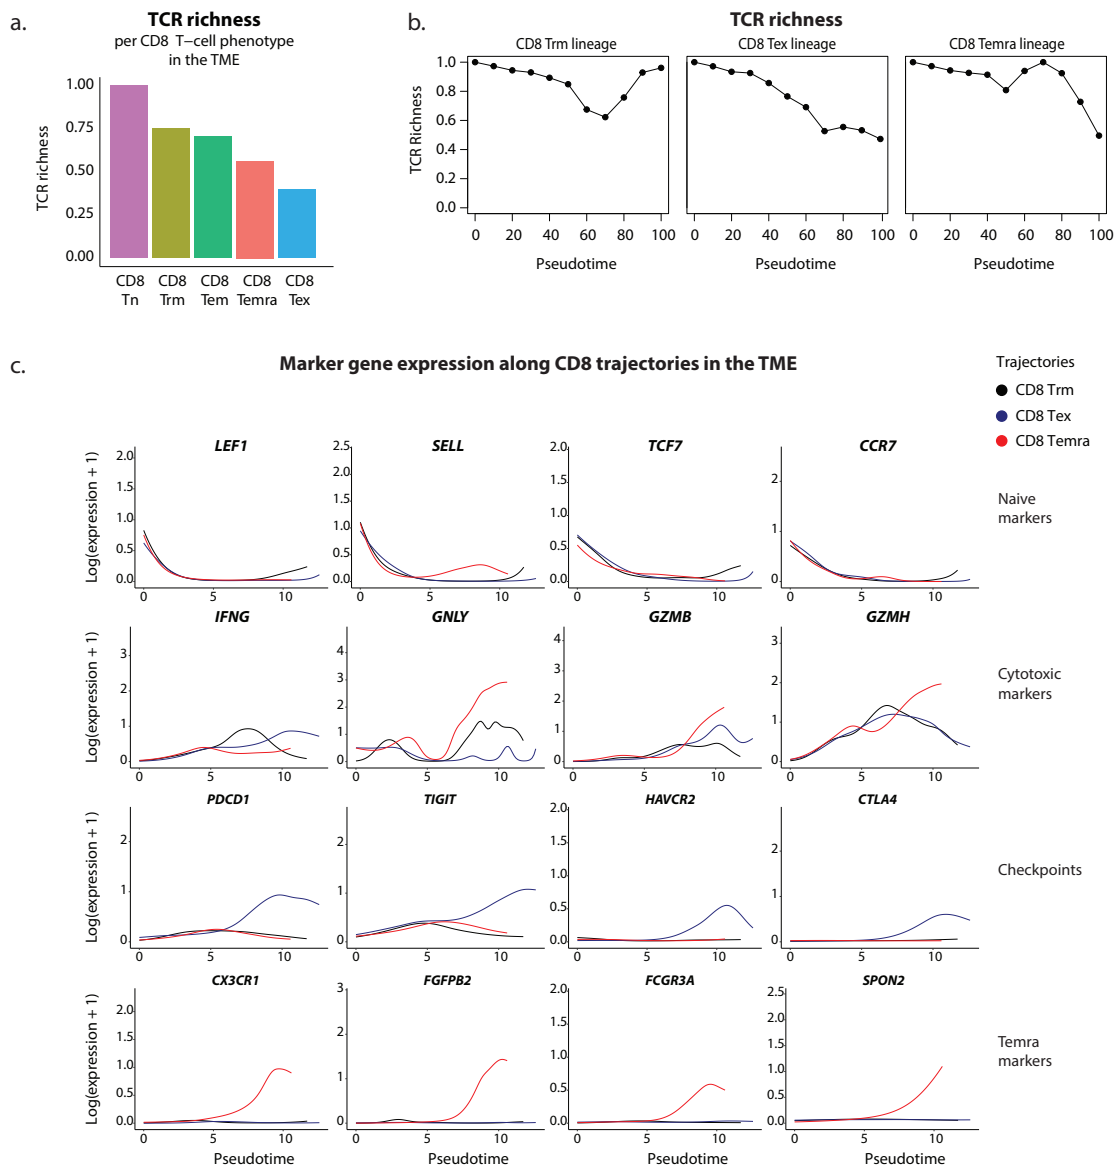

**Supplementary Figure 4**

**Supplementary Figure 4. Pseudo-time trajectories on intra-tumoural CD8 T-cells**

**a.** Bar plot showing TCR richness for each CD8 T-cell phenotype in the TME. **b.** TCR richness along each CD8 trajectory. **c.** Plots depicting the expression dynamics of marker and functional genes along each CD8 T-cell trajectory.

(TCR, T-cell receptor; TME, Tumour-microenvironment)

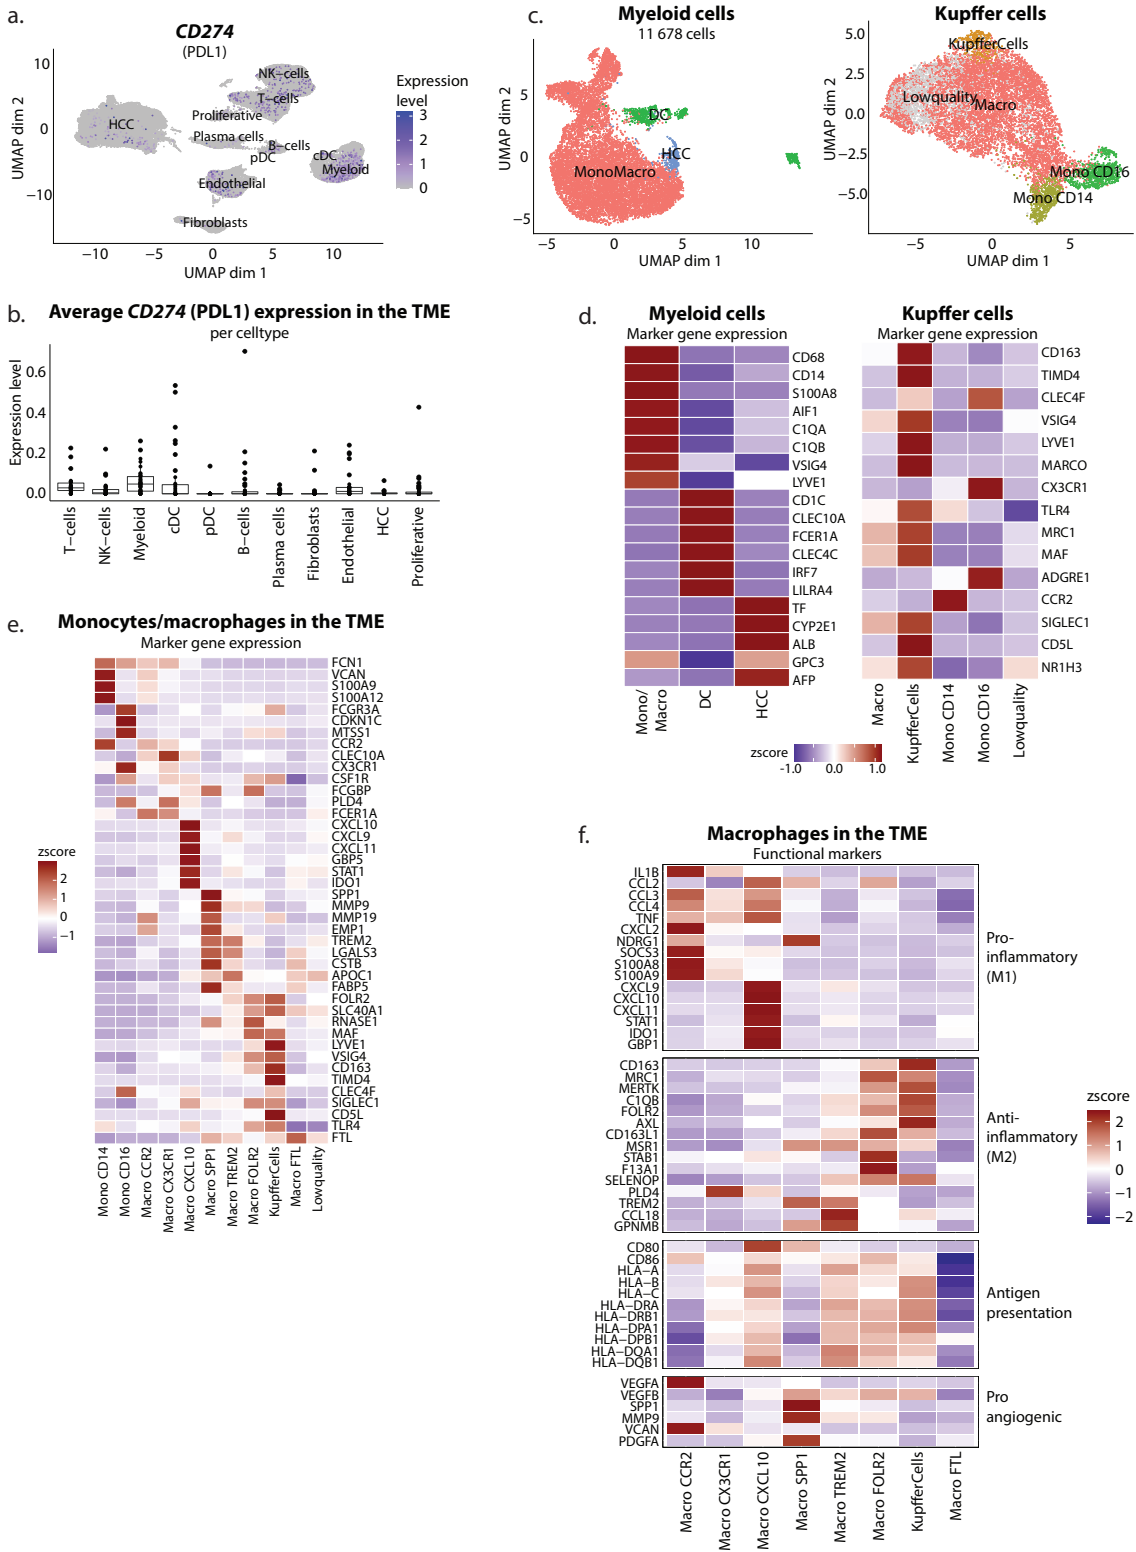

Supplementary Figure 5

Supplementary Figure 5. **Monocytes and macrophages in the TME of aHCC**

**a.** Feature plot of *CD274* (PDL<sub>1</sub>) expression in the TME. **b.** Boxplots depicting average *CD274* (PDL<sub>1</sub>) expression level per cell type in the TME, calculated per patient (n=38). Boxes indicate median +/- interquartile range; whiskers show minima and maxima. **c.** Subclustering of myeloid cells in the TME. *Left:* UMAP representation of myeloid cells in the TME identifying monocytes/macrophages and dendritic cells. *Right:* UMAP representation of macrophage subset in the TME, identifying Kupffer cells. **d.** *Left:* Heatmap displaying the expression of marker genes used for annotation of myeloid cells. *Right:* Heatmap displaying the expression of marker genes used for annotation of Kupffer cells. **e.** Heatmap displaying the expression of marker genes in each monocyte and macrophage phenotype. **f.** Heatmap depicting the expression of functional genes in macrophage subtypes. (PDL<sub>1</sub>, Programmed death-ligand 1; TME, Tumour-microenvironment; UMAP, Uniform Manifold Approximation and Projection).

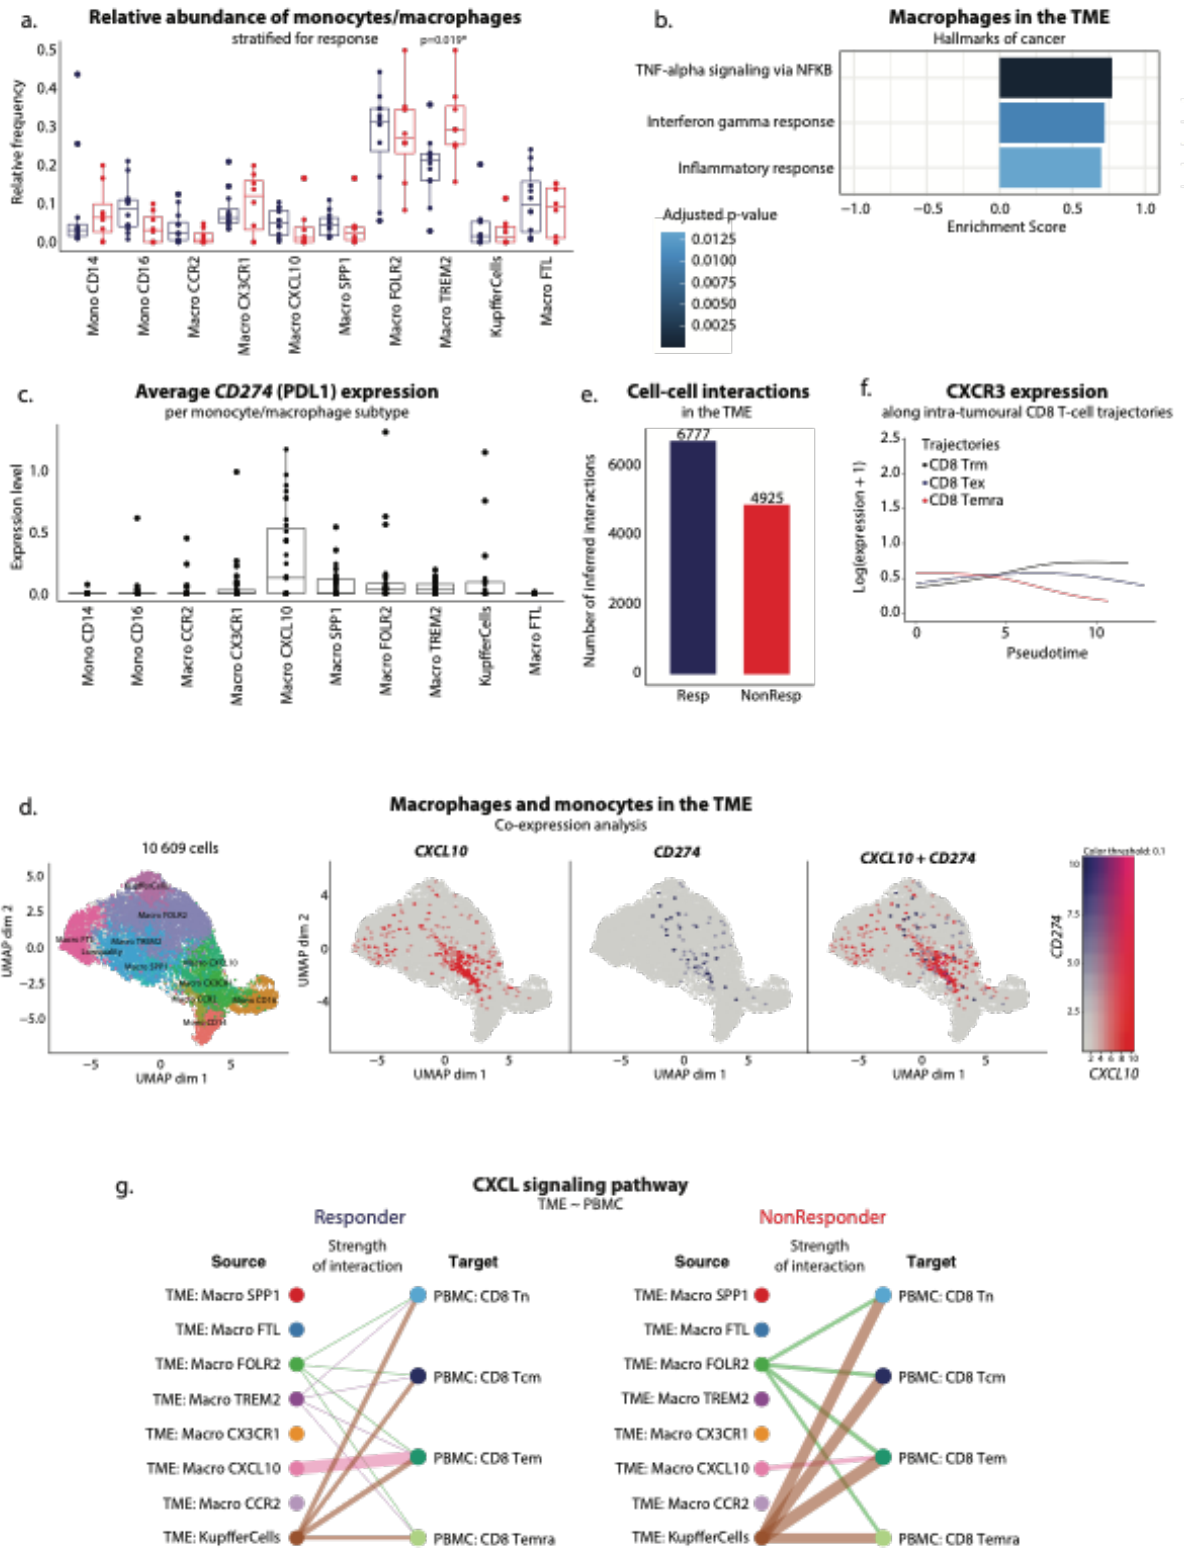

**Supplementary Figure 6**

Supplementary Figure 6. **Monocytes and macrophages: comparative analyses**

**a.** Boxplots depicting the relative abundance of monocyte and macrophage phenotypes in atezo/bev-treated patients (n=20), calculated per patient and stratified for response. P-values calculated using two-sided Mann-Whitney U-test, only p-values <0.05 are shown. Boxes indicate median +/- interquartile range; whiskers show minima and maxima. **b.** Pathway analysis on differentially expressed genes in macrophages in the TME of responders versus non-responders for the 'Hallmarks of cancer' gene sets. **c.** Boxplots depicting average *CD274* (PDL1) expression level, calculated per patient (n=38) in each monocyte and macrophage subtype. **d.** UMAP representation of intra-tumoural monocytes and macrophages, depicting the expression level of *CXCL10*, *CD274* and the combination of both. **e.** Bar plot showing the number of significant interactions between intra-tumoural myeloid cells and T-cells in responders versus non-responders. **f.** Plot depicting the expression dynamics of *CXCR3* along each CD8 T-cell trajectory within the TME. **g.** Hierarchy plot of the CXCL signaling pathway, depicting cell-cell interactions between intra-tumoural macrophages (source) and peripheral CD8 T-cells (target cells) in responders (*left*) and non-responders (*right*). The width of edges represent the strength of communication.

(PDL1, Programmed death-ligand 1; TME, Tumour-microenvironment; UMAP, Uniform Manifold Approximation and Projection).

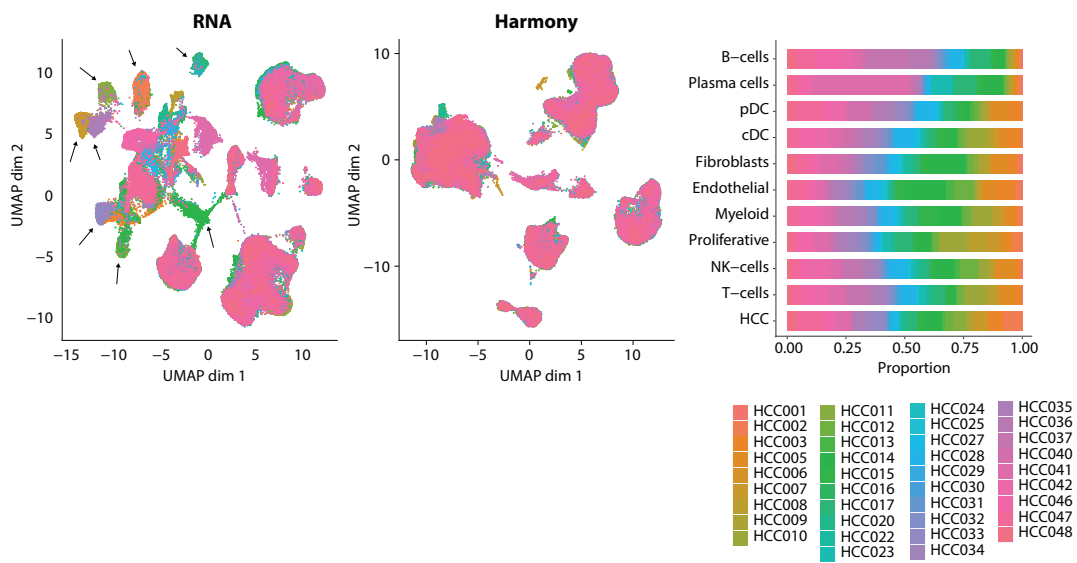

**Supplementary Figure 7**

**Supplementary Figure 7. Related to Methods**

UMAP colour-coded for individual patient with (*left*) and without (*middle*) integration using 'Harmony' and corresponding bar plot (*right*) showing the distribution of patients across cell types in the integrated dataset.

(UMAP, Uniform Manifold Approximation and Projection).

## 2. Supplementary Tables

Supplementary Table 1. Patient demographics, tumour characteristics and treatment data

| n=44                                          |                   |
|-----------------------------------------------|-------------------|
| Age in years; median (range)                  | 70 (24-85)        |
| Male sex – no. (%)                            | 34 (78)           |
| Cirrhosis – no. (%)                           | 26 (59)           |
| Underlying liver disease                      |                   |
| Alcohol – no. (%)                             | 18 (41)           |
| Obesity-related fatty-liver disease – no. (%) | 8 (18)            |
| Viral hepatitis - no. (%)                     | 3 (7)             |
| Adenoma – no. (%)                             | 1 (2)             |
| Other – no. (%)                               | 5 (11)            |
| Unknown/None – no. (%)                        | 9 (20)            |
| Previous treatment for HCC – no. (%)          |                   |
| Liver transplantation – no. (%)               | 2 (5)             |
| Local-regional – no. (%)                      | 9 (20)            |
| Systemic – no. (%)                            | 2 (5)             |
| TKI – no.                                     | 1                 |
| Chemotherapy – no.                            | 1                 |
| Systemic + Local-regional – no. (%)           | 2 (5)             |
| TKI + resection – no.                         | 1                 |
| TKI + chemotherapy + resection – no.          | 1                 |
| AFP                                           |                   |
| AFP in ng/mL – median (range)                 | 8,70 (1,2-400800) |
| AFP >10 ng/mL – no. (%)                       | 20 (45)           |
| AFP >400 ng/mL – no. (%)                      | 12 (27)           |
| Child-Pugh Score                              |                   |
| Class A – no. (%)                             | 39 (89)           |
| Class B – no. (%)                             | 5 (11)            |
| Tumour type                                   |                   |
| HCC – no. (%)                                 | 43 (98)           |
| Mixed – no. (%)                               | 1 (2)             |
| Tumour characteristics at baseline            |                   |
| BCLC C – no. (%)                              | 26 (60)           |
| Multinodular disease – no. (%)                | 35 (80)           |
| Extrahepatic spread – no. (%)                 | 14 (32)           |
| Macrovascular invasion – no. (%)              | 14 (32)           |
| Treatment                                     |                   |
| Tyrosine-kinase inhibitor (TKI) – no. (%)     | 5 (11)            |
| Sorafenib – no.                               | 3                 |

|                                 |         |
|---------------------------------|---------|
| Lenvatinib – no.                | 2       |
| Anti-PD(L)1 – no. (%)           | 11 (25) |
| Nivolumab, Pembrolizumab – no.  | 6       |
| Atezolizumab – no.              | 5       |
| Combination regimens            | 26 (59) |
| Atezolizumab/Bevacizumab - no.  | 25      |
| Atezolizumab/Cabozantinib - no. | 1       |
| Untreated - no. (%)             | 2 (5)   |

*HCC = Hepatocellular carcinoma; TKI = Tyrosine-kinase inhibitor; AFP = alpha-fetoprotein; Anti-PD(L)1 = antibody targeting PD1 (programmed cell death protein 1) or PDL1 (programmed death ligand 1))*

Supplementary Table 2. **Overview of sample availability**

| Patient ID | Tumour Biopsy | PBMC Week 0 | PBMC Week 3 | PBMC Week 6 |
|------------|---------------|-------------|-------------|-------------|
| HCC001     | Biopsy        | NA          | NA          | NA          |
| HCC002     | Biopsy        | NA          | NA          | NA          |
| HCC003     | Biopsy        | NA          | NA          | NA          |
| HCC005     | Biopsy        | NA          | NA          | NA          |
| HCC006     | Biopsy        | NA          | NA          | NA          |
| HCC007     | Biopsy        | NA          | NA          | NA          |
| HCC008     | Biopsy        | NA          | NA          | NA          |
| HCC009     | Biopsy        | NA          | NA          | NA          |
| HCC010     | Biopsy        | NA          | NA          | NA          |
| HCC011     | Biopsy        | NA          | NA          | NA          |
| HCC012     | Biopsy        | NA          | NA          | NA          |
| HCC013     | Biopsy        | PBMC1       | NA          | PBMC3       |
| HCC014     | Biopsy 1&2*   | PBMC1       | PBMC2       | PBMC3       |
| HCC015     | Biopsy        | NA          | NA          | NA          |
| HCC016     | Biopsy        | NA          | NA          | NA          |
| HCC017     | Biopsy        | PBMC1       | PBMC2       | PBMC3       |
| HCC020     | Biopsy        | PBMC1       | PBMC2       | PBMC3       |
| HCC022     | Biopsy        | PBMC1       | PBMC2       | PBMC3       |
| HCC023     | Biopsy        | PBMC1       | PBMC2       | PBMC3       |
| HCC024     | Biopsy        | PBMC1       | PBMC2       | PBMC3       |
| HCC025     | Biopsy        | PBMC1       | PBMC2       | PBMC3       |
| HCC026     | NA            | PBMC1       | PBMC2       | PBMC3       |
| HCC027     | Biopsy        | PBMC1       | PBMC2       | PBMC3       |
| HCC028     | Biopsy        | PBMC1       | PBMC2       | PBMC3       |
| HCC029     | Biopsy        | PBMC1       | PBMC2       | PBMC3       |
| HCC030     | Biopsy        | PBMC1       | PBMC2       | PBMC3       |



|        |             |       |       |       |
|--------|-------------|-------|-------|-------|
| HCCo31 | Biopsy      | PBMC1 | PBMC2 | NA    |
| HCCo32 | Biopsy 1&2* | NA    | NA    | NA    |
| HCCo33 | Biopsy      | NA    | NA    | NA    |
| HCCo34 | Biopsy      | PBMC1 | PBMC2 | PBMC3 |
| HCCo35 | Biopsy      | NA    | NA    | NA    |
| HCCo36 | Biopsy      | PBMC1 | PBMC2 | PBMC3 |
| HCCo37 | Biopsy      | NA    | NA    | NA    |
| HCCo40 | Biopsy      | PBMC1 | PBMC2 | PBMC3 |
| HCCo41 | Biopsy      | NA    | NA    | NA    |
| HCCo42 | Biopsy      | PBMC1 | PBMC2 | PBMC3 |
| HCCo46 | Biopsy      | PBMC1 | PBMC2 | PBMC3 |
| HCCo47 | Biopsy      | PBMC1 | PBMC2 | NA    |
| HCCo48 | Biopsy      | NA    | NA    | NA    |
| HCCX4  | NA          | PBMC1 | PBMC2 | PBMC3 |
| HCCX5  | NA          | PBMC1 | PBMC2 | PBMC3 |
| HCCX6  | NA          | PBMC1 | PBMC2 | PBMC3 |
| HCCX7  | NA          | PBMC1 | PBMC2 | PBMC3 |
| HCCX8  | NA          | PBMC1 | PBMC2 | PBMC3 |

PBMC=peripheral mononuclear cells; NA = not available.

\*Two biopsies were obtained from the same tumour nodule.

Supplementary Table 3. **PBMC pooling matrix**

| ID      | Sample 1            | Sample 2    | Sample 3 |
|---------|---------------------|-------------|----------|
| PBMC 1  | HCCo13 – Wo         | HCCX4 – Wo  |          |
| PBMC 2  | HCCo13 – W6         | HCCX7 – Wo  |          |
| PBMC 3  | HCCo14 – Wo         | HCCX4 – W3  |          |
| PBMC 4  | HCCo14 – W3         | HCCX5 – Wo  |          |
| PBMC 5  | HCCo14 – W6         | HCCX5 – W3  |          |
| PBMC 6  | <i>test samples</i> | HCCX5 – W6  |          |
| PBMC 7  | <i>test samples</i> | HCCX4 – W6  |          |
| PBMC 8  | <i>test samples</i> | HCCX7 – W3  |          |
| PBMC 9  | HCCo17 – Wo         | HCCo23 – W6 |          |
| PBMC 10 | HCCo17 – W3         | HCCX6 – Wo  |          |
| PBMC 11 | HCCo17 – W6         | HCCX6 – W3  |          |
| PBMC 12 | HCCo20 – Wo         | HCCX6 – W6  |          |

|          |                     |                     |             |
|----------|---------------------|---------------------|-------------|
| PBMC 13  | HCCo20 – W3         | HCCX7 – W6          |             |
| PBMC 14  | HCCo20 – W6         | HCCX8 – Wo          |             |
| PBMC 15  | HCCo23 – Wo         | HCCX8 – W3          |             |
| PBMC 16  | HCCo23 – W3         | HCCX8 – W6          |             |
| PBMC 17  | <i>test samples</i> | HCCo31 – Wo*        |             |
| PBMC 18  | HCCo24 – Wo         | <i>test samples</i> |             |
| PBMC 19  | HCCo24 – W3         | HCCo25 – W6         |             |
| PBMC 20  | HCCo24 – W6         | HCCo29 – Wo         |             |
| PBMC 21  | HCCo28 – Wo         | HCCo26 – Wo         |             |
| PBMC 22  | HCCo28 – W3         | HCCo26 – W3         |             |
| PBMC 23  | HCCo28 – W6         | HCCo29 – W3         |             |
| PBMC 24  | HCCo25 – Wo         | HCCo29 – W6         |             |
| PBMC 25  | HCCo25 – W3         | HCCo26 – W6         |             |
| PBMC 26  | HCCo22 – Wo         | HCCo31 – W3         |             |
| PBMC 27  | HCCo22 – W3         | HCCo34 – Wo         |             |
| PBMC 28  | HCCo22 – W6         | HCCo34 – W3         |             |
| PBMC 29B | HCCo30 – Wo         | HCCo34 – W6         |             |
| PBMC 30  | HCCo30 – W3         | HCCo36 – Wo         |             |
| PBMC 31  | HCCo30 – W6         | HCCo36 – W3         |             |
| PBMC 32  | HCCo31 – Wo*        | HCCo36 – W6         |             |
| PBMC 42  | HCCo42 – Wo         | HCCo40 – Wo         | HCCo47 – Wo |
| PBMC 43  | HCCo43 – W3         | HCCo46 – W3         | HCCo27 – W6 |
| PBMC 44  | HCCo42 – W6         | HCCo40 – W6         | HCCo46 – Wo |
| PBMC 45  | HCCo40 – W3         | HCCo46 – W6         | HCCo27 – Wo |
| PBMC 46  | HCCo47 – W3         | HCCo27 – W3         |             |

*\*same sample*
