# Supplementary material for: PD-1- CD45RA+ effector-memory CD8 T cells and CXCL10+ macrophages are associated with response to atezolizumab plus bevacizumab in advanced hepatocellular carcinoma
Source: PubMed Central journal article supplement (PMC10687033; doi:10.1038/s41467-023-43381-1), 2023-11-29
Supplement: 41467_2023_43381_MOESM3_ESM.pdf [file 41467_2023_43381_MOESM3_ESM.pdf]

## **Description of additional supplementary files**

**Supplementary Dataset 1:** Overview of 162 antibodies from TotalSeq-C (Biolegend)
